# Supplementary material
Source: PubMed Central journal article supplement (PMC2612097)
Supplement: NIHMS80571-supplement-2.pdf [file NIHMS80571-supplement-2.pdf]

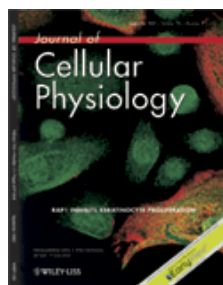

## Journal of Cellular Physiology

Published Online:  
12 Nov 2008

Copyright ©  
2008 Wiley-Liss, Inc., A  
Wiley  
Company

[View all  
previous titles  
for this journal](#)

- [Get Sample Copy](#)
- [Recommend to Your Librarian](#)
- [Save journal to My Profile](#)
- [Set E-Mail Alert](#)
- [Email this page](#)
- [Print this page](#)
- [RSS web feed \(What is RSS?\)](#)

### Search in this Title

Journal of Cellular Physiology

### Search by Citation

Vol: Issue: Page:

[Save Article to My Profile](#) [Download Citation](#)

[< Previous Abstract](#) | [Next Abstract >](#)

[Abstract](#) | [References](#) | [Full Text: HTML](#) | [Supporting Information](#) | [Related Articles](#) | [Citation Tracking](#)

Additional supporting information may be found in the online version of this article.

Supplementary Figure 1. Intracellular localization of CRF1a-EGFP isoforms in HaCaT keratinocytes. Keratinocytes were transiently transfected with CRF1a-GFP (green) and stained with organelle markers (red or violet) as described in Methods. Co-localization is shown in yellow.

Supplementary Figure 2. Intracellular localization of CRF1c-GFP isoforms in HaCaT keratinocytes. Keratinocytes were transiently transfected with CRF1c-GFP (green) and stained with organelle markers (red or violet). Co-localization is shown in yellow.

Supplementary Figure 3. Intracellular localization of CRF1d-GFP isoforms in HaCaT keratinocytes. Keratinocytes were transiently transfected with CRF1d-GFP (green) and stained with organelle markers (red or violet). Co-localization is shown in yellow.

Supplementary Figure 4. Intracellular localization of CRF1e-GFP isoforms in HaCaT keratinocytes. Keratinocytes were transiently transfected with CRF1e-EGFP (green) and stained with organelle markers (red or violet). Co-localization is shown in yellow.

Supplementary Figure 5. Intracellular localization of CRF1f-GFP isoforms in HaCaT keratinocytes. Keratinocytes were transiently transfected with CRF1f-EGFP (green) and stained with organelle markers (red or violet). Co-localization is shown in yellow.

Supplementary Figure 6. Intracellular localization of CRF1g-GFP isoforms in HaCaT keratinocytes. Keratinocytes were transiently transfected with CRF1g-EGFP (green) and stained with organelle markers (red or violet). Co-localization is shown in yellow.

### SEARCH WILEY INTERSCIENCE

All Content

Publication Titles

[Advanced Search](#)

[CrossRef / Google Search](#)

[Acronym Finder](#)

### Special Features

[Other Resources](#)

### LATEST NEWS & INFORMATION

#### New Editor in Chief

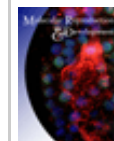

Supplementary Figure 7. Intracellular localization of CRF1h-GFP isoforms in HaCaT keratinocytes. Keratinocytes were transiently transfected with CRF1h-GFP (green) and stained with organelle markers (red or violet). Co-localization is shown in yellow.

Supplementary Figure 8. Intracellular localization of GFP in HaCaT keratinocytes (control). Keratinocytes were transiently transfected with EGFP (green) and stained with organelle markers (red or violet).

Supplementary Figure 9. Detection of CRF1 immunoreactivity in HaCaT keratinocytes. (A) Non-transfected keratinocytes were stained with anti-CRF1 antibody (see Methods section for details). The experimental keratinocytes were transfected with DNA of plasmids carrying CRF1 isoforms a (B), f (C) or h (D) with V5 tag on the C terminus. Immunoreactivity of V5 tag was detected using anti-V5 tag antibody and isoform a was found predominantly in the cell membrane, while isoform f and h showed intracellular localization.

Supplementary Figure 10. Binding of CRF to CRF1a-GFP fusion receptor. Keratinocytes were transfected with DNA of plasmid carrying CRF1a-GFP construct and, after 24 hours, treated with 100 nM CRF. A. Transfected cell before treatment (control for panel B). B. Co-localization (yellow) of CRF1 (green) with CRF peptide fused with Rodamine B (Phoenix Pharmaceuticals, INC, Belmont, CA) 20 minutes after treatment. C. Transfected cell before treatment (control for panel D). D. Internalization of CRF1-GFP fusion receptor 20 minutes after treatment with CRF (Sigma, St. Louise, MO).

Table S1. Primers used in preparation of GFP, dsRED and V5 tagged receptors.

- [sm001.tif](#) (510k) (TIFF image)
- [sm002.tif](#) (515k) (TIFF image)
- [sm003.tif](#) (394k) (TIFF image)
- [sm004.tif](#) (524k) (TIFF image)
- [sm005.tif](#) (525k) (TIFF image)
- [sm006.tif](#) (384k) (TIFF image)
- [sm007.tif](#) (572k) (TIFF image)
- [sm008.tif](#) (506k) (TIFF image)
- [sm009.tif](#) (818k) (TIFF image)
- [sm010.tif](#) (349k) (TIFF image)
- [sm011.doc](#) (143k) (Microsoft Word)

### Related Articles

- Find other [articles](#) like this in Wiley InterScience
- Find articles in Wiley InterScience written by any of the [authors](#)

Wiley InterScience is a member of CrossRef.

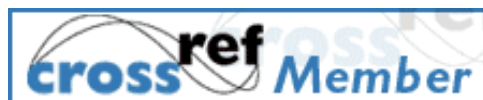

[Request Reprint](#)

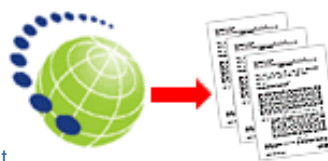

Congratulations to **Gary M. Wessel**, the new Editor-in-Chief of

### Molecular Reproduction & Development.

Guided under Dr. Wessel's leadership, the journal will take an exciting new direction in response to the rapidly changing research field of molecular mechanisms in reproduction and development.

Check out the [new scope and vision!](#)

### ALSO OF INTEREST

#### Current Protocols in Cell Biology

An essential reference for methods for researchers who study the cell - its structure, organization, behavior, and functions

Now available via online laboratory subscription

Go to [Current Protocols in Cell Biology](#)

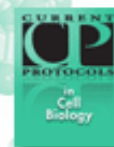

### ALSO OF INTEREST

#### Current Protocols in Cytometry

A "best practices" collection that distills and organizes the absolute latest techniques from the top cytometry labs and specialists worldwide.

Now available via online laboratory subscription

Go to [Current Protocols in Cytometry](#)

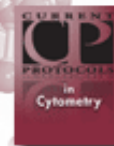

**ALSO OF INTEREST**

**Current Protocols in  
Molecular Biology**

An essential tool for anyone  
at the forefront of molecular  
biology research

Now available via  
online laboratory  
subscription

Go to  
Current Protocols  
in Molecular Biology

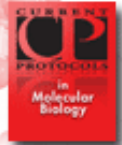

**ALSO OF INTEREST**

**Current Protocols in  
Stem Cell Biology**

Protocols and methods for  
isolating, characterizing, and  
differentiating both embryonic  
and somatic stem cells

Now available via  
online laboratory  
subscription

Go to  
Current Protocols  
in Stem Cell Biology

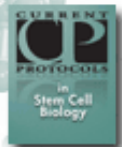

Comprehensive  
Peer-Reviewed  
Reliable

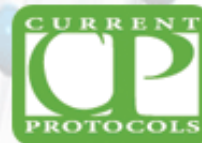

Institutional  
Licenses  
&  
Online  
Laboratory  
Subscriptions  
Available!

Go to:  
[currentprotocols.com](http://currentprotocols.com)  
for information

[About Wiley InterScience](#) | [About Wiley](#) | [Privacy](#) | [Terms & Conditions](#)  
Copyright © 1999-2008 [John Wiley & Sons, Inc.](#) All Rights Reserved.
